# Supplementary material
Source: ML conference proceedings conference paper supplement (https://proceedings.mlr.press/v139/wang21f.html)
Supplement: Supplementary file [file wang21f-supp.pdf]

# Explainable Automated Graph Representation Learning with Hyperparameter Importance

Supplementary File

## Proof

**Lemma 1** *If the number of covariates  $p_1$  and  $p_2$  is fixed, then there exists a sample weight  $\gamma \succeq 0$  such that*

$$\lim_{n \rightarrow \infty} \mathcal{L}_{Deco} = 0 \quad (1)$$

with probability 1. In particular, a solution  $\gamma$  to Eq (1) is  $\gamma_i^* = \frac{\prod_{j=1}^p \hat{f}(\mathbf{X}_{i,j})}{\hat{f}(\mathbf{X}_{i,1}, \dots, \mathbf{X}_{i,p})}$ , where  $\hat{f}(x_{\cdot,j})$  and  $\hat{f}(x_{\cdot,1}, \dots, x_{\cdot,p})$  are the Kernel density estimators.<sup>1</sup>

**Proof 1** From [1], if  $h_j \rightarrow 0$  for  $j = 1, \dots, p$  and  $nh_1 \dots h_p \rightarrow \infty$ ,

$$\hat{f}(x_{i,j}) = f(x_{i,j}) + o_p(1)$$

and

$$\hat{f}(x_i) = f(x_i) + o_p(1)$$

Note that for any  $j$ ,

$$\begin{aligned} \frac{1}{n} \sum_{i=1}^n \mathbf{X}_{i,j} \gamma_i &= \frac{1}{n} \sum_{i=1}^n \mathbf{X}_{i,j} \frac{\prod_{j=1}^p f(\mathbf{X}_{i,j})}{\hat{f}(\mathbf{X}_{i,1}, \dots, \mathbf{X}_{i,p})} + o_p(1) \\ &= \mathbb{E} \left[ \mathbf{X}_{i,j} \frac{\prod_{j=1}^p f(\mathbf{X}_{i,j})}{\hat{f}(\mathbf{X}_{i,1}, \dots, \mathbf{X}_{i,p})} \right] + o_p(1) \\ &= \int \dots \int \mathbf{X}_{i,j} \prod_{l=1}^p f(\mathbf{X}_{i,l}) d\mathbf{X}_{i,1} \dots d\mathbf{X}_{i,p} + o_p(1) \\ &= \int \mathbf{X}_{i,j} f(x_{i,j}) d\mathbf{X}_{i,j} + o_p(1) \end{aligned}$$

Similarly, for any  $j$  and  $k$ ,  $j \neq k$

$$\begin{aligned} \frac{1}{n} \sum_{i=1}^n \mathbf{X}_{i,j} \mathbf{X}_{i,k} \gamma_i &= \frac{1}{n} \sum_{i=1}^n \mathbf{X}_{i,j} \mathbf{X}_{i,k} \frac{\prod_{j=1}^p f(\mathbf{X}_{i,j})}{\hat{f}(\mathbf{X}_{i,1}, \dots, \mathbf{X}_{i,p})} + o_p(1) \\ &= \mathbb{E} \left[ \mathbf{X}_{i,j} \mathbf{X}_{i,k} \frac{\prod_{j=1}^p f(\mathbf{X}_{i,j})}{\hat{f}(\mathbf{X}_{i,1}, \dots, \mathbf{X}_{i,p})} \right] + o_p(1) \\ &= \int \int \mathbf{X}_{i,j} \mathbf{X}_{i,k} f(x_{i,j}) f(x_{i,k}) d\mathbf{X}_{i,j} d\mathbf{X}_{i,k} \\ &= \int \mathbf{X}_{i,j} f(x_{i,j}) d\mathbf{X}_{i,j} \cdot \int \mathbf{X}_{i,k} f(x_{i,k}) d\mathbf{X}_{i,k} \end{aligned}$$

---

<sup>1</sup>In detail,  $\hat{f}(x_{i,j}) = \frac{1}{nh_j} \sum_{i=1}^n k\left(\frac{\mathbf{X}_{i,j} - x_{i,j}}{h_j}\right)$ , where  $k(u)$  is a kernel function and  $h_j$  is the bandwidth parameter for covariate  $\mathbf{X}_j$ ; and  $\hat{f}(x_i) = \frac{1}{n|H|} \sum_{i=1}^n K(H^{-1}(\mathbf{X}_i - x_i))$ , where  $K(u)$  is a multivariate kernel function,  $H = \text{diag}(h_1, \dots, h_p)$  and  $|H| = h_1 \dots h_p$ .

Thus, for any  $j \neq k$ , we have

$$\lim_{n \rightarrow \infty} \left( \frac{1}{n} \sum_{i=1}^n \mathbf{X}_{i,j} \mathbf{X}_{i,k} \gamma_i - \left( \frac{1}{n} \sum_{i=1}^n \mathbf{X}_{i,j} \gamma_i \right) \left( \frac{1}{n} \sum_{i=1}^n \mathbf{X}_{i,k} \gamma_i \right) \right)^2 = 0.$$

Hence, for any  $\mathbf{A}_{\cdot,j} \neq \mathbf{X}_{\cdot,k}$ , we have

$$\lim_{n \rightarrow \infty} \left( \frac{1}{n} \sum_{i=1}^n \mathbf{A}_{i,j} \mathbf{X}_{i,k} \gamma_i - \left( \frac{1}{n} \sum_{i=1}^n \mathbf{A}_{i,j} \gamma_i \right) \left( \frac{1}{n} \sum_{i=1}^n \mathbf{X}_{i,k} \gamma_i \right) \right)^2 = 0.$$

Finally,

$$\lim_{n \rightarrow \infty} \sum_{j=1}^{p_1} \left\| \mathbf{A}_{\cdot,j}^T \boldsymbol{\Sigma}_\gamma \mathbf{X}_{\cdot,-j} / n - \mathbf{A}_{\cdot,j}^T \boldsymbol{\gamma} / n \cdot \mathbf{X}_{\cdot,-j}^T \boldsymbol{\gamma} / n \right\|_2^2 = 0.$$

But the solution  $\boldsymbol{\gamma}$  that satisfies Eq (1) in Lemma 1 is not unique. To address this problem, we propose to simultaneously minimize the variance of  $\boldsymbol{\gamma}$  and restrict the sum of  $\boldsymbol{\gamma}$  in our regularizer as follows:

$$\hat{\boldsymbol{\gamma}} = \arg \min_{\boldsymbol{\gamma} \in \mathcal{C}} \mathcal{L}_{Deco} + \frac{\lambda_3}{n} \sum_{i=1}^n \gamma_i^2 + \lambda_4 \left( \frac{1}{n} \sum_{i=1}^n \gamma_i - 1 \right)^2, \quad (2)$$

where  $\mathcal{C} = \{\boldsymbol{\gamma} : |\gamma_i| \leq c\}$  for some constant  $c$ .

Then, we have following theorem on our hyperparameter decorrelation regularizer in Eq (2).

**Theorem 1** *The solution  $\hat{\boldsymbol{\gamma}}$  defined in Eq (2) is unique if  $\lambda_3 n \gg p^2 + \lambda_4$ ,  $p^2 \gg \max(\lambda_3, \lambda_4)$  and  $|\mathbf{X}_{i,j}| \leq c$  for some constant  $c$ .*

**Proof 2** *For simplicity, we let  $\mathcal{L}_1 := \frac{1}{n} \sum_{i=1}^n \gamma_i^2$ ,  $\mathcal{L}_2 := \left( \frac{1}{n} \sum_{i=1}^n \gamma_i - 1 \right)^2$ , and  $\mathcal{J}(\boldsymbol{\gamma}) := \mathcal{L}_{Deco} + \lambda_3 \mathcal{L}_1 + \lambda_4 \mathcal{L}_2$ .*

*First, we calculate Hessian of  $\mathcal{J}(\boldsymbol{\gamma})$ , denoted as  $\mathbf{H}$ , as follows:*

$$\mathbf{H} = \frac{\partial^2 \mathcal{L}_B}{\partial \boldsymbol{\gamma}^2} + \lambda_3 \frac{\partial^2 \mathcal{L}_1}{\partial \boldsymbol{\gamma}^2} + \lambda_4 \frac{\partial^2 \mathcal{L}_2}{\partial \boldsymbol{\gamma}^2}.$$

With some algebra, we have

$$\begin{aligned} \frac{\partial^2 \mathcal{L}_1}{\partial \boldsymbol{\gamma}^2} &= \frac{1}{n} \mathbf{I}, \\ \frac{\partial^2 \mathcal{L}_2}{\partial \boldsymbol{\gamma}^2} &= \frac{1}{n^2} \vec{\mathbf{1}} \vec{\mathbf{1}}^T, \end{aligned}$$

where  $\mathbf{I} \in \mathbb{R}^{n \times n}$  is identity matrix, and  $\vec{\mathbf{1}} = [1, \dots, 1]^T \in \mathbb{R}^{n \times 1}$ .

For the term  $\mathcal{L}_{Deco}$ , when  $|\mathbf{X}_{i,j}| \leq c$ , for any  $j$  and  $k$ , we have

$$\begin{aligned} \frac{\partial^2}{\partial \boldsymbol{\gamma}^2} \left( \frac{1}{n} \sum_{i=1}^n \mathbf{X}_{i,j} \mathbf{X}_{i,k} \gamma_i \right)^2 &= \mathcal{O} \left( \frac{1}{n^2} \right), \\ \frac{\partial^2}{\partial W^2} \left( \left( \frac{1}{n} \sum_{i=1}^n \mathbf{X}_{i,j} \gamma_i \right) \left( \frac{1}{n} \sum_{i=1}^n \mathbf{X}_{i,k} \gamma_i \right) \right)^2 &= \mathcal{O} \left( \frac{1}{n^2} \right). \end{aligned}$$

and

$$\frac{\partial^2}{\partial \gamma^2} \left( \left( \frac{1}{n} \sum_{i=1}^n \mathbf{X}_{i,j} \mathbf{X}_{i,k} \gamma_i \right) \left( \frac{1}{n} \sum_{i=1}^n \mathbf{X}_{i,j} \gamma_i \right) \left( \frac{1}{n} \sum_{i=1}^n \mathbf{X}_{i,k} \gamma_i \right) \right) = \mathcal{O} \left( \frac{1}{n^2} \right).$$

Then

$$\frac{\partial^2}{\partial \gamma^2} \left( \frac{1}{n} \sum_{i=1}^n \mathbf{X}_{i,j} \mathbf{X}_{i,k} \gamma_i - \left( \frac{1}{n} \sum_{i=1}^n \mathbf{X}_{i,j} \gamma_i \right) \left( \frac{1}{n} \sum_{i=1}^n \mathbf{X}_{i,k} \gamma_i \right) \right)^2 = \mathcal{O} \left( \frac{1}{n^2} \right).$$

$\mathcal{L}_{Deco}$  is sum of  $p(p-1)$  such terms, then

$$\frac{\partial^2 \mathcal{L}_B}{\partial \gamma^2} = \mathcal{O} \left( \frac{p^2}{n^2} \right).$$

Thus,

$$\mathbf{H} = \mathcal{O} \left( \frac{p^2}{n^2} \right) + \frac{\lambda_3}{n} \mathbf{I} + \frac{\lambda_4}{n^2} \bar{\mathbf{I}} \bar{\mathbf{I}}^T = \frac{\lambda_3}{n} \mathbf{I} + \mathcal{O} \left( \frac{p^2 + \lambda_4}{n^2} \right).$$

Therefore,  $\mathbf{H}$  is an almost diagonal matrix when  $\frac{\lambda_3}{n} \gg \frac{p^2 + \lambda_4}{n^2}$ , equivalent to  $\lambda_3 n \gg p^2 + \lambda_4$ . From the relative Weyl theorem [2],  $\mathbf{H}$  is positive definite. Then the loss function  $\mathcal{J}(\gamma)$  in Eq (2) is convex on  $\mathcal{C}$ , and has a unique optimal solution  $\hat{\gamma}$ .

We further want  $\mathcal{L}_{Deco}$  to dominate the regularization terms  $\lambda_3 \mathcal{L}_1$  and  $\lambda_4 \mathcal{L}_2$ . On  $\mathcal{C}$ ,  $\mathcal{L}_1 = \mathcal{O}(1)$  and  $\mathcal{L}_2 = \mathcal{O}(1)$ . Moreover,

$$\left( \frac{1}{n} \sum_{i=1}^n \mathbf{X}_{i,j} \mathbf{X}_{i,k} \gamma_i - \left( \frac{1}{n} \sum_{i=1}^n \mathbf{X}_{i,j} \gamma_i \right) \left( \frac{1}{n} \sum_{i=1}^n \mathbf{X}_{i,k} \gamma_i \right) \right)^2 = \mathcal{O}(1).$$

and then

$$\mathcal{L}_{Deco} = \mathcal{O}(p^2).$$

As long as  $p^2 \gg \max(\lambda_3, \lambda_4)$ ,  $\mathcal{L}_{Deco}$  dominates the regularization terms  $\mathcal{L}_1$  and  $\mathcal{L}_2$ .

## References

- [1] Bruce E Hansen. Lecture notes on nonparametrics. *Lecture notes*, 2009.
- [2] Yuji Nakatsukasa. Absolute and relative weyl theorems for generalized eigenvalue problems. *Linear Algebra and its Applications*, 432(1):242–248, 2010.
